# Supplementary material for: Long non‑coding RNA L13Rik promotes high glucose-induced mesangial cell hypertrophy and matrix protein expression by regulating miR-2861/CDKN1B axis
Source: PeerJ journal article supplement (doi:10.7717/peerj.16170), 2023-10-16
Supplement: RawData.zip [file RawData.zip]

## Sheet: fig5B
Control			L13Rik			L13Rik+miR-2861
100	104.9	100.7	139.2	154.7	141.6	113.4	109.8	125.3

## Sheet: fig5C
	NG	L13Rik	L13Rik+miR-2861
	1.07	2.4	1.35
	0.91	2.27	1.51
	1.03	2.1	1.3
Mean	1.00333	2.25667	1.38667	}
SD	0.0832666	0.150444	0.109697

## Sheet: fig5D-1
Area	Aisle	CT	TM	Type	Gene	The sample name
A01	FAM	13.37	80	Unknown	GAPDH	Control
A02	FAM	13.27	78.5	Unknown	GAPDH	Control
A03	FAM	13.35	79.5	Unknown	GAPDH	Control
A04	FAM	13.43	81.5	Unknown	GAPDH	Control
A05	FAM	13.33	79	Unknown	GAPDH	Control
A06	FAM	13.41	81.5	Unknown	GAPDH	Control
A07	FAM	13.42	80	Unknown	GAPDH	Control
A08	FAM	13.49	80.5	Unknown	GAPDH	Control
A09	FAM	13.46	78.5	Unknown	GAPDH	Control
A10	FAM	13.54	79.5	Unknown	GAPDH	L13Rik
A11	FAM	13.47	81	Unknown	GAPDH	L13Rik
A12	FAM	13.51	81.5	Unknown	GAPDH	L13Rik
B01	FAM	13.53	82	Unknown	GAPDH	L13Rik
B02	FAM	13.68	80	Unknown	GAPDH	L13Rik
B03	FAM	13.52	81.5	Unknown	GAPDH	L13Rik
B04	FAM	13.58	80	Unknown	GAPDH	L13Rik
B05	FAM	13.68	81.5	Unknown	GAPDH	L13Rik
B06	FAM	13.65	82	Unknown	GAPDH	L13Rik
B07	FAM	13.66	79.5	Unknown	GAPDH	L13Rik+miR-2861
B08	FAM	13.82	78.5	Unknown	GAPDH	L13Rik+miR-2861
B09	FAM	13.7	81	Unknown	GAPDH	L13Rik+miR-2861
B10	FAM	13.56	79	Unknown	GAPDH	L13Rik+miR-2861
B11	FAM	13.51	81	Unknown	GAPDH	L13Rik+miR-2861
B12	FAM	13.67	81.5	Unknown	GAPDH	L13Rik+miR-2861
C01	FAM	13.6	79.5	Unknown	GAPDH	L13Rik+miR-2861
C02	FAM	13.66	78.5	Unknown	GAPDH	L13Rik+miR-2861
C03	FAM	13.68	81.5	Unknown	GAPDH	L13Rik+miR-2861
C04	FAM	27.53	79	Unknown	FN	Control
C05	FAM	27.54	79.5	Unknown	FN	Control
C06	FAM	27.45	81	Unknown	FN	Control
C07	FAM	27.35	81.5	Unknown	FN	Control
C08	FAM	27.35	82	Unknown	FN	Control
C09	FAM	27.46	80	Unknown	FN	Control
C10	FAM	27.36	81.5	Unknown	FN	Control
C11	FAM	27.41	78	Unknown	FN	Control
C12	FAM	27.41	80.5	Unknown	FN	Control
D01	FAM	26.15	81	Unknown	FN	L13Rik
D02	FAM	26.06	78.5	Unknown	FN	L13Rik
D03	FAM	26.11	82	Unknown	FN	L13Rik
D04	FAM	26.01	80.5	Unknown	FN	L13Rik
D05	FAM	26	78	Unknown	FN	L13Rik
D06	FAM	26.14	79	Unknown	FN	L13Rik
D07	FAM	26.09	81.5	Unknown	FN	L13Rik
D08	FAM	26.04	80	Unknown	FN	L13Rik
D09	FAM	26.16	81.5	Unknown	FN	L13Rik
D10	FAM	27.23	82	Unknown	FN	L13Rik+miR-2861
D11	FAM	27.31	79.5	Unknown	FN	L13Rik+miR-2861
D12	FAM	27.14	78.5	Unknown	FN	L13Rik+miR-2861
E01	FAM	26.8	81	Unknown	FN	L13Rik+miR-2861
E02	FAM	26.95	81.5	Unknown	FN	L13Rik+miR-2861
E03	FAM	26.89	79.5	Unknown	FN	L13Rik+miR-2861
E04	FAM	27.17	79	Unknown	FN	L13Rik+miR-2861
E05	FAM	27.21	78.5	Unknown	FN	L13Rik+miR-2861
E06	FAM	27.13	79.5	Unknown	FN	L13Rik+miR-2861
E07	FAM	28.51	80.5	Unknown	Col lV	Control
E08	FAM	28.55	81	Unknown	Col lV	Control
E09	FAM	28.61	80	Unknown	Col lV	Control
E10	FAM	28.77	78.5	Unknown	Col lV	Control
E11	FAM	28.7	79.5	Unknown	Col lV	Control
E12	FAM	28.64	81	Unknown	Col lV	Control
F01	FAM	28.87	80	Unknown	Col lV	Control
F02	FAM	28.93	81.5	Unknown	Col lV	Control
F03	FAM	28.9	78.5	Unknown	Col lV	Control
F04	FAM	27.19	79.5	Unknown	Col lV	L13Rik
F05	FAM	27.13	81	Unknown	Col lV	L13Rik
F06	FAM	27.21	80.5	Unknown	Col lV	L13Rik
F07	FAM	27.29	82	Unknown	Col lV	L13Rik
F08	FAM	27.21	79	Unknown	Col lV	L13Rik
F09	FAM	27.37	79.5	Unknown	Col lV	L13Rik
F10	FAM	27.16	82	Unknown	Col lV	L13Rik
F11	FAM	27.26	80	Unknown	Col lV	L13Rik
F12	FAM	27.26	81.5	Unknown	Col lV	L13Rik
G01	FAM	28.26	79.5	Unknown	Col lV	L13Rik+miR-2861
G02	FAM	28.14	78.5	Unknown	Col lV	L13Rik+miR-2861
G03	FAM	28.09	81.5	Unknown	Col lV	L13Rik+miR-2861
G04	FAM	28.13	80	Unknown	Col lV	L13Rik+miR-2861
G05	FAM	27.99	82	Unknown	Col lV	L13Rik+miR-2861
G06	FAM	28.14	79.5	Unknown	Col lV	L13Rik+miR-2861
G07	FAM	28.24	80	Unknown	Col lV	L13Rik+miR-2861
G08	FAM	28.31	81.5	Unknown	Col lV	L13Rik+miR-2861
G09	FAM	28.24	79.5	Unknown	Col lV	L13Rik+miR-2861
G10	FAM	26.81	79	Unknown	N-cad	Control
G11	FAM	26.93	78.5	Unknown	N-cad	Control
G12	FAM	26.92	78.5	Unknown	N-cad	Control
H01	FAM	27.03	79.5	Unknown	N-cad	Control
H02	FAM	27.11	81	Unknown	N-cad	Control
H03	FAM	27	81.5	Unknown	N-cad	Control
H04	FAM	26.94	78.5	Unknown	N-cad	Control
H05	FAM	26.91	79.5	Unknown	N-cad	Control
H06	FAM	26.95	81.5	Unknown	N-cad	Control
H07	FAM	25.51	79.5	Unknown	N-cad	L13Rik
H08	FAM	25.6	81.8	Unknown	N-cad	L13Rik
H09	FAM	25.57	80.5	Unknown	N-cad	L13Rik
H10	FAM	25.76	79	Unknown	N-cad	L13Rik
H11	FAM	25.74	79.5	Unknown	N-cad	L13Rik
H12	FAM	25.64	81	Unknown	N-cad	L13Rik

## Sheet: fig5D-2
Area	Aisle	CT	TM	Type	Gene	The sample name
A01	FAM	25.87	78.5	Unknown	N-cad	L13Rik
A02	FAM	25.79	79	Unknown	N-cad	L13Rik
A03	FAM	25.75	81	Unknown	N-cad	L13Rik
A04	FAM	26.52	79.5	Unknown	N-cad	L13Rik+miR-2861
A05	FAM	26.54	80	Unknown	N-cad	L13Rik+miR-2861
A06	FAM	26.39	79.5	Unknown	N-cad	L13Rik+miR-2861
A07	FAM	26.41	80	Unknown	N-cad	L13Rik+miR-2861
A08	FAM	26.29	78.5	Unknown	N-cad	L13Rik+miR-2861
A09	FAM	26.44	79.5	Unknown	N-cad	L13Rik+miR-2861
A10	FAM	26.56	81	Unknown	N-cad	L13Rik+miR-2861
A11	FAM	26.5	80	Unknown	N-cad	L13Rik+miR-2861
A12	FAM	26.55	82	Unknown	N-cad	L13Rik+miR-2861

## Sheet: fig5F
	Control	L13Rik	L13Rik+miR-2861
FN	0.21	0.56	0.31
	0.19	0.63	0.36
	0.22	0.67	0.39
Col IV	0.13	0.44	0.26
	0.15	0.38	0.29
	0.14	0.39	0.24
N-cad	0.18	0.51	0.29
	0.16	0.44	0.26
	0.17	0.49	0.21
β-actin	0.76	0.75	0.76
	0.79	0.73	0.77
	0.75	0.78	0.74
OD FN/β-actin	0.276316	0.746667	0.407895
	0.240506	0.863014	0.467532
	0.293333	0.858974	0.527027
OD Col IV/β-actin	0.171053	0.586667	0.342105
	0.189873	0.520548	0.376623
	0.186667	0.5	0.324324
OD N-cad/β-actin	0.236842	0.68	0.381579
	0.202532	0.60274	0.337662
	0.226667	0.628205	0.283784
