# Supplementary material for: Long non‑coding RNA L13Rik promotes high glucose-induced mesangial cell hypertrophy and matrix protein expression by regulating miR-2861/CDKN1B axis
Source: PeerJ journal article supplement (doi:10.7717/peerj.16170), 2023-10-16
Supplement: Supplemental_images_of_WB.pdf [file Supplemental_images_of_WB.pdf]

Figure 2, 4, 5

Repeat 1

Repeat 2

Repeat 3

N-cad

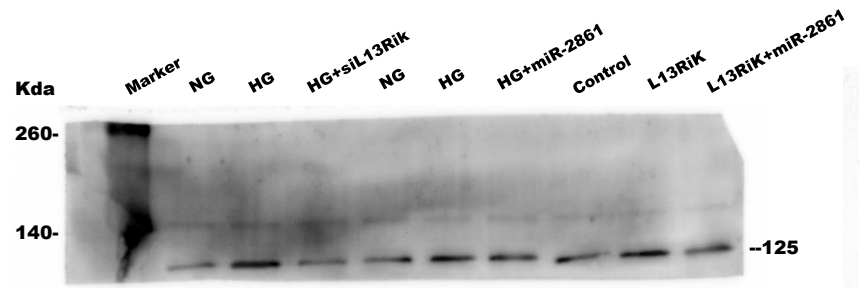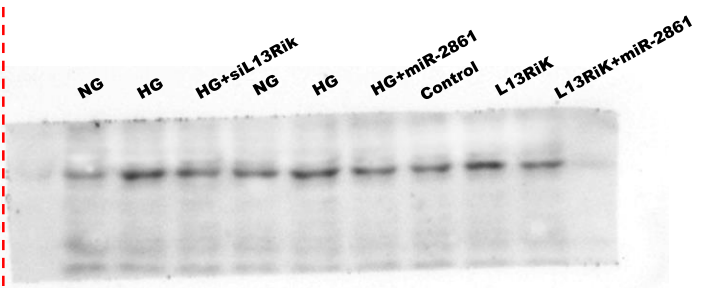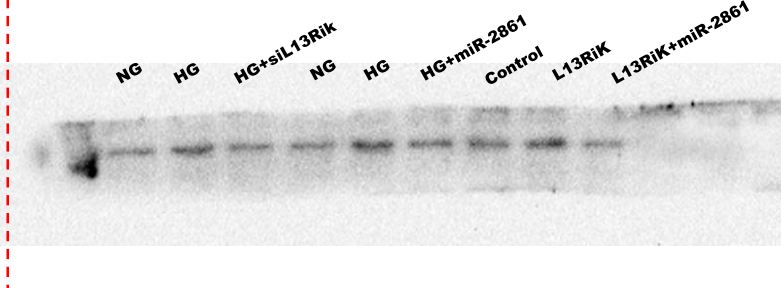

FN

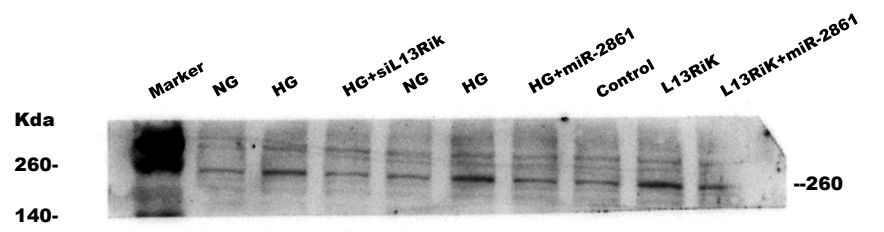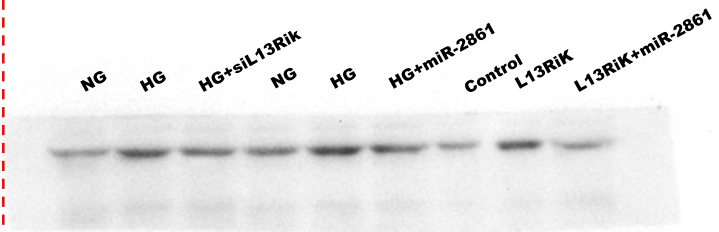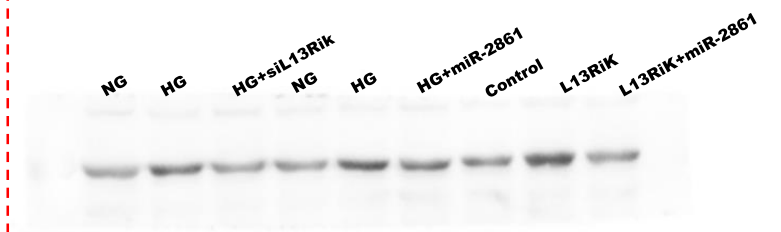

Col IV

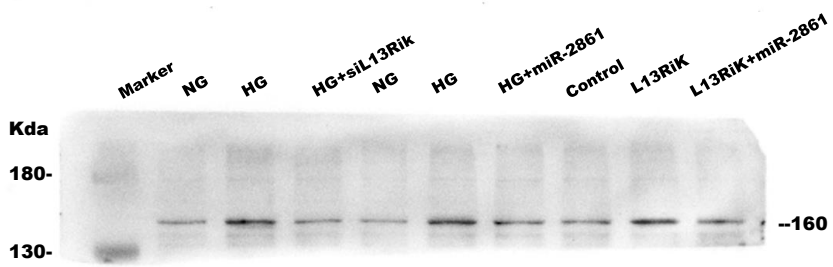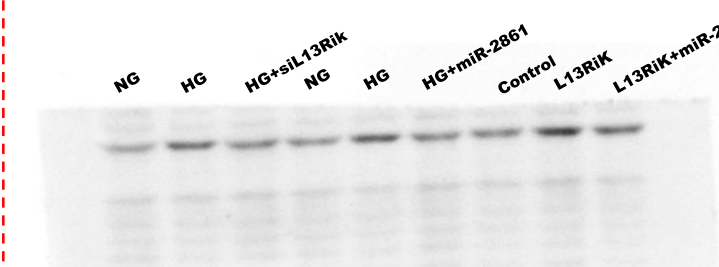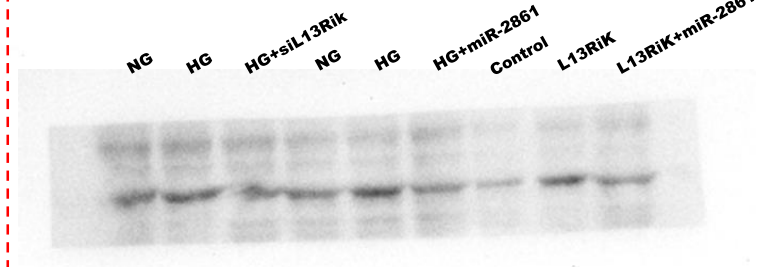

Actin

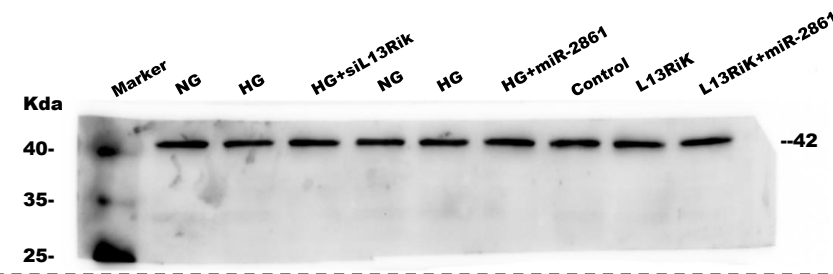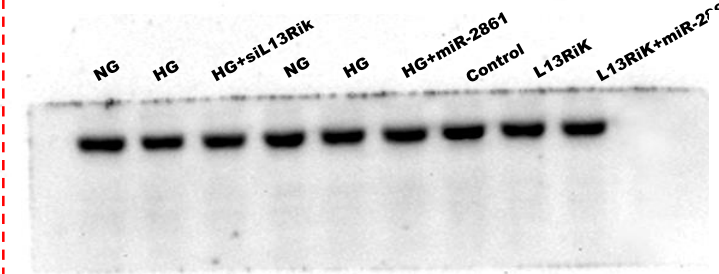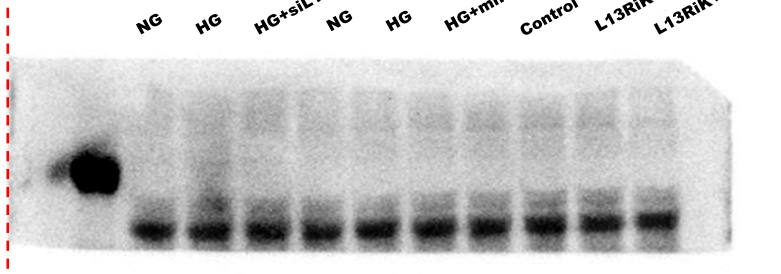

Repeat 1 are used for main figures

**Figure 6**

**Repeat 1**

**Repeat 2**

**Repeat 3**

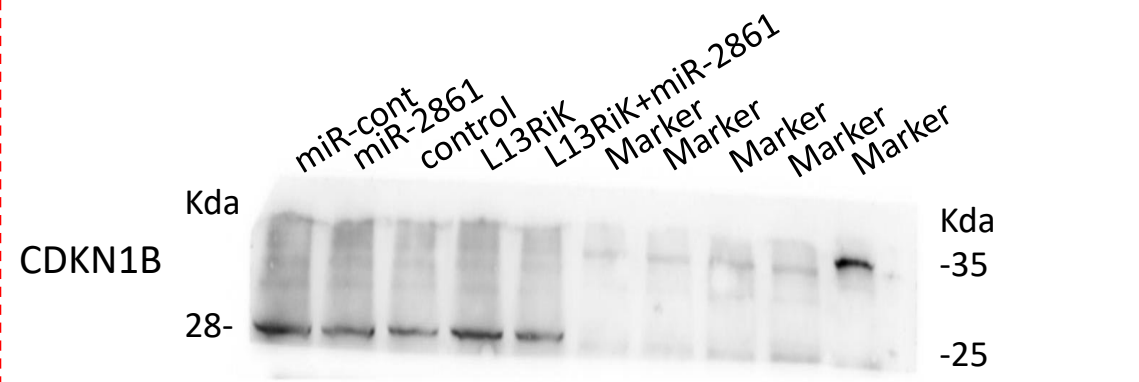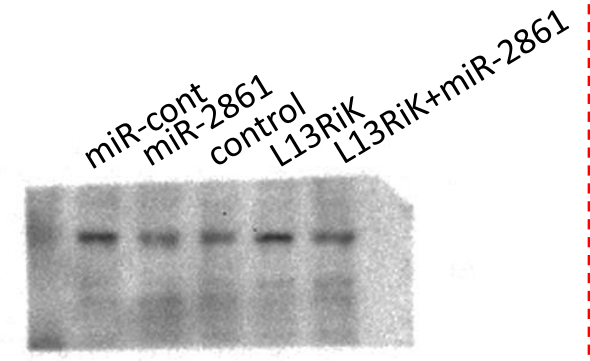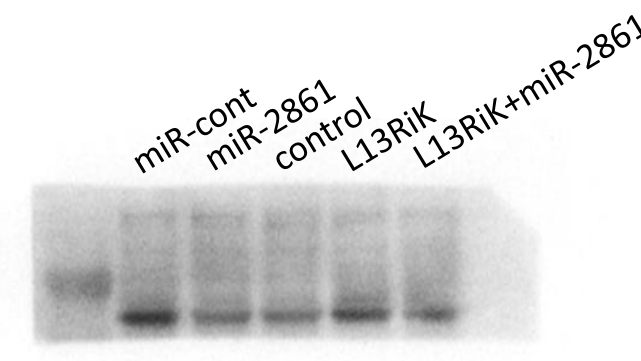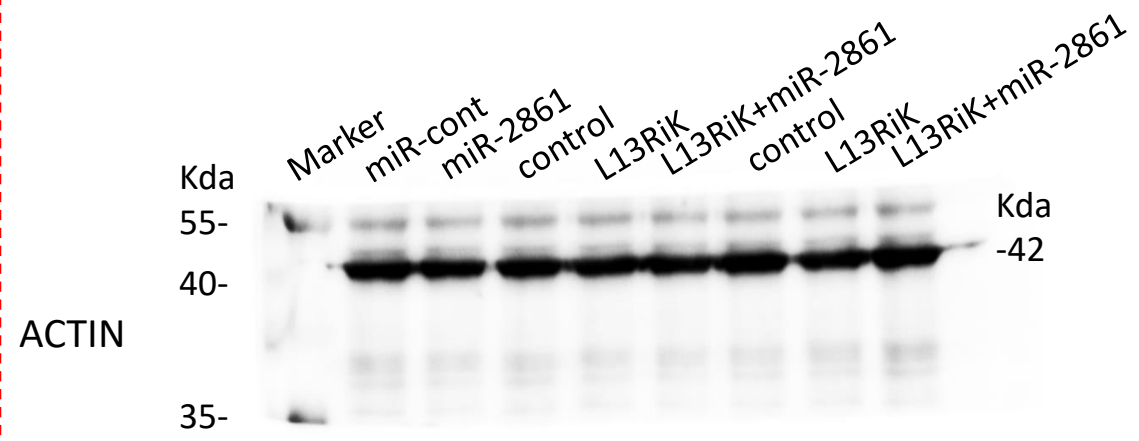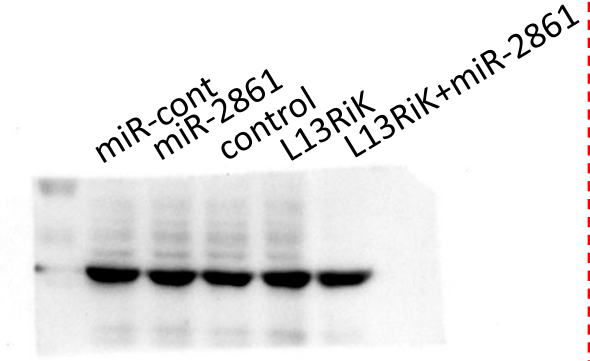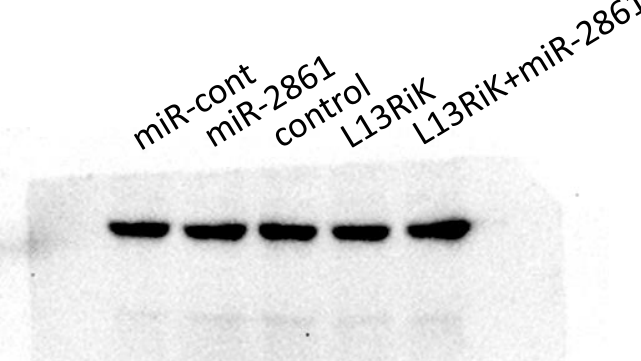

**Repeat 1 are used for main figures**
